# Supplementary material
Source: PubMed Central journal article supplement (PMC2919920)
Supplement: 0914328107_pnas.0914328107_SI.pdf [file 0914328107_pnas.0914328107_SI.pdf]

# Supporting Information

Mehedint et al. 10.1073/pnas.0914328107

## SI Text

**SI Methods and Materials. Animals.** Timed-pregnant C57BL/6 mice were ordered from Jackson Laboratory, Inc. (Bar Harbor, ME) at gestation day 7 and used in all experiments according to a protocol described elsewhere (S1). The animals were kept in a temperature-controlled environment at 24 °C and exposed to a 12 h light and dark cycle. All the dams received AIN-76A pelleted diet with the standard 1.1 g/kg (7.8 mmol/kg) choline chloride (control diet; control (CT); Dyets, Inc., Bethlehem, PA) and water ad libitum until the end of embryonic day 11 (E11) when they were randomly assigned to one of three feeding groups: choline deficient (CD; AIN-76A diet with 0 g/kg choline chloride), CT or choline supplemented (CS; AIN-76A diet with 4.95 g/kg choline chloride). The mice received the experimental diets from the night of gestational day 11 until they were killed on E17. On E15, a single intraperitoneal injection of 50 mg/kg body weight 5-bromo-2'-deoxyuridine (BrdU; Sigma-Aldrich, Inc., St. Louis, Mo) was administered to the pregnant dams.

**Fetal brain collection.** On E17 the fetal brains from two male pups from each litter were collected using methods we previously published (S2). The fetal brains were cut in 5  $\mu$ m coronal sections, and the hippocampal sections were used for further immunohistochemical analysis. All the tissue sections were selected from anatomically equivalent areas according to a standard atlas of the developing brain (S3). This study was replicated. The remaining brains from the litter were collected individually, frozen in liquid nitrogen, and stored at  $-80^{\circ}\text{C}$  for gene expression determinations.

**Fetal mouse neural progenitor cells (NPC) in culture.** Neural Progenitor Cells (NPC) in culture maintain similar phenotypes to their corresponding progenitors from the hippocampal ventricular (VZ) and subventricular (SVZ) in terms of chromatin architecture, remodeling, histone modifications, and gene expression (S4–S8). NPC from embryonic day 14 C57BL/6 mice were obtained from Lonza (Walkersville, MD) and plated according to the manufacturer's protocol using Neurobasal medium (Invitrogen, Purchase, NY). The medium was supplemented with 2 mM L-glutamine (Invitrogen), 100 U/mL penicillin–streptomycin (Invitrogen), 2% B27 supplement without vitamin A (Invitrogen), 20 ng/mL murine EGF (Invitrogen), 20 ng/mL human FGF (Invitrogen), and 2 mg/mL heparin (Invitrogen). Small tertiary neurospheres were generated as previously described (S9). The cells were assigned to two different treatment groups (up to  $n = 7$  plates/group), passaged to new uncoated plates and suspended in custom Neurobasal medium (D700SA, Atlanta Biologicals, Lawrenceville, SA) containing 5  $\mu$ M choline chloride (CD), 70  $\mu$ M choline chloride (CT), or 280  $\mu$ M choline chloride (CS) with the ingredients described above. These choline concentrations are similar to those measured in vivo in fetal brain after pregnant dams were fed the CD, CT, or CS diets (S9). The optimal exposure time, 72 h, was determined after the assessment of proliferation and apoptosis changes (S9) so as to avoid artifacts associated with cell death. This time frame allowed the NPC to complete several cell cycles at an expansion rate of 10–15 fold/7 d (S10). NPC colonies were pelleted by centrifugation and immediately processed for total protein extraction, genomic DNA extraction, total mRNA isolation, or chromatin precipitation.

**Immunohistochemistry in paraffin-embedded sections.** To assess EC proliferation, a double immunolabeling technique utilizing both BrdU (S-phase marker) and isolectin IB4 (vasculature marker) was used. Developmental angiogenesis occurs in waves (S11); therefore we evaluated EC proliferation over a period of 48 h (E15–E17). During S-phase, proliferating EC incorporate BrdU into newly synthesized DNA strands (S12). GSA-I lectins are markers of EC, selectively staining alpha-D-galactosyl residues expressed by the developing vascular tree (S13, S14). Paraffin-embedded hippocampal coronal sections were selected from anatomically identical regions in order to minimize differences due to the anterior–posterior gradient in neurogenesis (S15). The slides were deparaffinized with xylene and then rehydrated using ethanol in decreasing concentrations. Tissue auto-fluorescence was minimized by incubating the slides at room temperature for 1 h in 0.25%  $\text{NH}_4\text{OH}$  (Sigma) in ethanol 70%. Antigen retrieval for nuclear antigens was performed using citric acid buffer pH = 6 at 100 °C for 10 min, followed by incubation in Proteinase K 20  $\mu$ g/mL (Sigma). The BrdU epitopes were further exposed by enzymatic digestion of genomic DNA with DNase I 10 U/mL (Invitrogen Inc., Carlsbad, CA) for 40 min at room temperature. Reduction of nonspecific epitopes was accomplished by incubating all tissue sections in blocking buffer containing 10% normal goat serum (Sigma) in PBS + 0.1% Tween 20 (PBST) overnight at 4 °C, followed by endogenous biotin blocking (E-21390, Molecular Probes—Invitrogen) for 2 h at room temperature. The slides, except for the negative controls, were incubated for 3 h at room temperature in a cocktail of primary probes composed of: Isolectin GS-IB4—biotin conjugated antibody (5  $\mu$ g/mL; I21414, Invitrogen) 1:100 dilution in PBST and rat antiBrdU monoclonal antibody (0.2 mg/mL; and MCA2060, AbDSerotec; Raleigh, NC) 1:100 dilution in PBST; 0.1 mM  $\text{CaCl}_2$  was added to the labeling buffer, according to the manufacturer's protocol. For each staining, seven different fetal brains per group (CD and CT, respectively) were used, each from a different dam. An additional slide per group was placed into the blocking buffer, without the first antibody, and used as a negative control. After washing, all the sections were incubated for 2 h at room temperature in a mixture of secondary antibodies and probes: streptavidin-ALEXA 488 nm (Invitrogen) 1:100 dilution of 1 mg/mL stock solution and goat anti-rat—ALEXA 555 nm (Invitrogen) 1:500 of the 1 mg/mL stock solution in PBST.

Following a similar protocol, equivalent sections were probed for Von Willebrand factor (Factor VIII related antigen, VW factor)—Factor VIII complex using a cocktail of primary antibodies. Rabbit polyclonal antibodies against VW factor (18-0018, Zymed Laboratories, Invitrogen, Carlsbad, CA), and against factor VIII heavy (H-19) (sc-27647, Santa-Cruz Biotechnology Inc., Santa-Cruz, CA) and light chains (sc-33584, Santa-Cruz) targeting precursor and mature Factor VIII chains, were all diluted 1:200 from their initial concentration of 0.5 mg/mL in blocking buffer (10% goat serum in PBST). The slides were incubated for 48 h at 4 °C and rinsed in PBST. Finally, fluorescent labeling was performed with goat anti-rabbit IgG-HRP conjugated followed by ALEXA 546 nm-tyramide signal amplification (T20923, TSA Kit#13, Invitrogen-Molecular Probes). In all cases, 4', 6-diamidino-2-phenylindole (DAPI, Sigma) 0.1  $\mu$ g/mL for 20 min was used for staining the nuclear DNA.

**Image analysis.** Fluorescent images (magnifications 4 $\times$ , 10 $\times$ , and 20 $\times$ ) of VW Factor or BrdU-isolectin stained sections were collected with a Nikon FXA microscope (Nikon, Garden City, NY)

equipped with an Optronics TEC-470 CCD Video Camera System (Optronics Engineering). The images, acquired from the same field with different fluorescent probes, were then merged. The labeling level and background fluorescence level for selected areas were measured as OD using the ImageJ software version 1.37v (<http://rsb.info.nih.gov/ij>, NIH) and checked for variations across all samples. The number of blood vessels and the average cross-sectional area of isolectin positive vessels were counted using the ImageJ software with an integrated macro for analyzing particles. Dimensions were obtained by calibrating all images to a common reference image. The proliferation index of EC was calculated as the ratio of colabeled BrdU-isolectin positive cells to DAPI-isolectin positive cells in both hippocampi of each brain in six consecutive 5  $\mu\text{m}$  sections. For analysis of capillary numbers and cross-sectional volume, we selected consecutive sections totaling 30  $\mu\text{m}$  of thickness from medial-frontal region of the hippocampus from six fetuses from different dams. To assess the number of EC clusters that were VW Factor positive, the fluorescent structures were counted per entire hippocampus as well as for selected hippocampal regions: CA1 (Cornu Ammoni region 1), CA2, CA3, and DG (Dentate Gyrus).

**Real-time RT-PCR.** RNA was extracted from cultured NPC or from whole brain samples using the RNeasy Mini Kit (Qiagen, Valencia, CA). After determining the concentration and quality, the resulting total mRNA was stored at  $-80^{\circ}\text{C}$ . A two-step Real-Time PCR method was used for the assessment of gene expression. First, a High Capacity cDNA Reverse Transcription Kit (Applied Biosystems, Foster City, CA) containing random primers was used as described in the manufacturer's protocol to generate single stranded DNA template. After transcription, a volume of sample that did not exceed 2 ng cDNA/ $\mu\text{L}$  of the template per PCR was amplified in the second step. Amplification conditions were adjusted using the standard curve method for an optimal slope, 100% PCR efficiency, and no nonspecific products. Almost identical efficiencies were achieved for the gene of interest and the *TBP* housekeeping gene. *TBP* mature RNA levels do not vary with choline availability in the central nervous system, as shown in published microarray studies (S6). The following primers were designed for *Angpt2* (mus musculus angiopoietin 2): forward 5'-GTGTGGACTTCCAGAGGA-3' and reverse 5'-GCTGGATCTTAAGCACGTA-3', accession number NM\_007426.3; and *Tbp* (TATA box binding protein): forward 5'-ACCCACACAGGGTGCCTCA-3' and reverse 5'-TGGCAGGAGTGATAGGGGTCA-3' (accession number NT\_123456) genes. *Vegfc* (VEGF C) primer pair was designed and synthesized by SuperArray (PPM03061E, SuperArray, MD) sequence accession number NM\_009506.2. The primers were designed using the Gene Fisher interactive PCR primers design software support (<http://bibiserv.techfak.uni-bielefeld.de/genefisher/>) (S16). The primer pairs were tested by RT-PCR for dimer formation. To ensure against nonspecific priming, nonredundant BLAST searches were performed for all primers (<http://www.ncbi.nlm.nih.gov/BLAST/>).

A 25  $\mu\text{L}$  reaction mixture containing 450 nM primers, 2 ng cDNA, and the Real-Time PCR Master Mix IQ SYBR Green Supermix Biorad, was used for all reactions. The conditions for the amplification reactions were:  $95^{\circ}\text{C}$  for 10 min; 40 cycles of  $94^{\circ}\text{C}$  for 15 sec,  $56^{\circ}\text{C}$  for 30 sec, and  $72^{\circ}\text{C}$  for 50 sec; followed by a melting curve to ensure single amplicon generation. The relative quantification method ( $2^{-\Delta\Delta\text{CT}}$ ) was used to analyze gene expression changes as described elsewhere (S17).

**Methylated CpG island recovery assay (MIRA).** We used a method for analyzing CpG island methylation based on the high affinity of MBD protein complex for methylated cytosines (S18). CpG enrichment facilitates an accurate detection of methylated DNA even in low methylated sample (MethylCollector Ultra Kit;

Active Motif, Carlsbad, CA). Genomic DNA was isolated from choline deficient and control NPC samples using Qiagen DNAeasy minicolumns (Qiagen) following manufacturer's protocol, quantified with a Nanodrop 8000 spectrophotometer (Nanodrop, Wilmington, DE) and stored in elution buffer at  $-80^{\circ}\text{C}$ . In preparation for the enrichment step, 4000 ng of gDNA from each sample were digested with *MseI* restriction enzyme for 2 h at  $37^{\circ}$  followed by heat-inactivation. Input DNA aliquots were purified by "QIAquick PCR purification Kit" (Qiagen), incubated with recombinant His-MBD2b/MBD3L1 protein complex followed by capture with protein G coated magnetic beads. The DNA isolated by this method as well as sample aliquots saved before the enrichment step were purified again by QIAquick columns in preparation for Real-Time PCR analysis.

*Vegfc* and *Angpt2* genomic sequences were retrieved from the NIH mouse genome database (<http://www.ncbi.nlm.nih.gov/nucleo>) including the gene features (CpG islands and exons/introns locations). For each CpG island several primer pairs were designed using the Gene Fisher interactive PCR primers design software support (<http://bibiserv.techfak.uni-bielefeld.de/genefisher/>) (S16) and synthesized (Operon Biotechnologies; Huntsville, AL). The oligos were tested for specificity and efficiency of Real-Time PCR amplification in a 20  $\mu\text{L}$  volume comprising of Takara SYBR Premix Ex Taq (Takara Bio Inc., Otsu, Shiga, Japan) and a genomic DNA in serial dilution. The final PCR conditions for all primer pairs were:  $95^{\circ}\text{C}$  for 15 sec.,  $60^{\circ}\text{C}$  for 15 sec.,  $72^{\circ}\text{C}$  for 20 sec. Selected primer sequences used in this assay for *Vegfc* were: CpG island 1 forward 5'-ACCCCTCTTCTTTGCA-3', reverse 5'-GAGCCTCGGATCCTCA-3'; CpG island 2 forward 5'-AAACAGCTCAGGGTGAA-3', reverse 5'-CCTGGGTGCTCTGGAA-3'; CpG island 3 forward 5'-GTCATTATCTGCCGGAA-3', reverse 5'-AAAAGCCTGTGAGCCTA-3'. For *Angpt2* gene we selected the following oligo pairs: CpG island 1 forward 5'-TTCTCCAGCACCTGCA-3', reverse 5'-CTGTAGACTCAGGGGAGA-3'; CpG island 2 forward 5'-CAGCCCTGAGACTCTGA-3', reverse 5'-GGCTGATGAAGGTAGGAA-3'; CpG island 3 forward 5'-CGTGGGGACAAGCTCA-3', reverse 5'-CTGCAGCAAAGCAGTCA-3'. CpG islands were numbered from 1 to 3 starting from the TSS (transcription starting site). Positive and negative control primers were provided by the Activ Motif Kit and were able to amplify with great accuracy methylation free regions of *APC* gene (methylated only in adenocarcinoma cells) and *Xist* gene (fully methylated in males) (Fig. 5B—inset).

**ELISA.** NPC were cultured for 72 h in choline deficient, control and choline supplemented media as described above and total protein was extracted using RIPA buffer (Sigma) with 10% protease inhibitors (Sigma). Protein concentrations were determined by Lowry assay on a Synergy 2 microplate reader (Biotek, Vermont). The mouse ANGPT2 protein levels were evaluated using an ELISA kit (Cedarlane, Burlington, NC) as described by the manufacturer. The concentration of ANGPT2 was determined into 100  $\mu\text{g}$  of total protein diluted into the sample buffer and the absorbance read at 450 nm using the Synergy2 system. A mouse VEGFC sandwich ELISA assay was developed using a polyclonal antibody rabbit anti-mouse VEGFC detecting the precursor VEGFC (sc-9047) and the secreted form as capture antibody (Fig. S14, inset). We tested the specificity of binding by immunoprecipitation of VEGFC preprotein using Dynabeads M-280 Sheep anti-rabbit IgG (Invitrogen) followed by Western blot analysis of the elution. The VEGFC band was identified at 58 KDa. The detection antibody, goat polyclonal against mouse VEGFC (C terminus of the protein precursor) (Santa-Cruz), was biotinylated using BiotinTag Micro Biotinylation Kit (Sigma) as indicated by the manufacturer. 100 ng/mL of the capture antibody was bound to a coated Goat anti-rabbit 96-well microplate (cat. 15136, Pierce, Rockford, IL) for 1 h at room temperature and 50  $\mu\text{g}$  of NPC protein samples were loaded onto the plate and incubated for 90 min at room temperature. The plate was

incubated with 100 ng/mL detection antibody for 1 h. 100 ng/mL streptavidin-HRP conjugated (Invitrogen) was bound to biotin for 30 min at room temperature and the signal development was performed using the SuperSignal ELISA Pico Chemiluminescent Substrate (Thermo Scientific).

**Maternal Hepatic Phosphocholine.** Phosphocholine is the labile storage form for choline in liver and is an excellent indicator of dietary choline status (S19). Phosphocholine was analyzed by liquid chromatography—electrospray ionization—<sup>3</sup>H isotope dilution mass spectrometry as previously described (S20).

**Bioinformatic Analysis.** To analyze the distribution of cis—regulatory elements binding site (TFBS; transcription factor binding sites) within the CpG islands in the vicinity of TSS of *Vegfc* and *Angpt2* we used the public database NCBI NIH (<http://www.ncbi.nlm.nih.gov/nucore>—mm8) to download the genomic sequence of both genes of interest and also gather information about their exons (Evidence Viewer) and CpG islands. Putative TSS were

detected upstream of exon 1 for both genes using Promoter 2.0 Prediction Server (S21). Each CpG island sequence was uploaded to TFM Explorer (<http://bioinfo.lifl.fr/TFME/>) (S22) which uses position frequency matrixes from Transfac (S23) and Jaspar to extract cis-regulatory elements with the highest significance from all the predicted sites. The *P*-value is given by the probability of any TFBS to generate the same number of hits in the sequence of choice as in the Markovian background model (S22) (Fig. S2).

**Statistical analysis.** For gene expression the analysis was performed using the Relative Expression Software Tool—Multiple Condition Solver REST-MCS version 2 (free from the website <http://www.gene-quantification.de/rest.html>) which uses a pair wise fixed reallocation randomization test. All statistical analyses of epitope levels and vascular tree determinations were performed using JMP software (V 2; SAS Institute, Cary, NPC) with ANOVA and Tukey-Kramer tests. Data are presented as mean ± SE.

- Craciunescu CN, Albright CD, Mar MH, Song J, Zeisel SH (2003) Choline availability during embryonic development alters progenitor cell mitosis in developing mouse hippocampus. *J Nutr* 133:3614–3618.
- Craciunescu CN, Wu R, Zeisel SH (2006) Diethanolamine alters neurogenesis and induces apoptosis in fetal mouse hippocampus. *FASEB J* 20:1635–1640.
- Jacobowitz DM (1998) *Chemoarchitectonic Atlas of the Developing Mouse Brain* ed L.C. Abbott, (CRC Press, Boca Raton).
- Cremisi F, Philpott A, Ohnuma S (2003) Cell cycle and cell fate interactions in neural development. *Curr Opin Neurobiol* 13:26–33.
- Hsieh J, Gage FH (2004) Epigenetic control of neural stem cell fate. *Curr Opin Genet Dev* 14:461–469.
- Niculescu MD, Craciunescu CN, Zeisel SH (2005) Gene expression profiling of choline-deprived neural precursor cells isolated from mouse brain. *Brain Res Mol Brain Res* 134:309–322.
- Niculescu MD, Craciunescu CN, Zeisel SH (2006) Dietary choline deficiency alters global and gene-specific DNA methylation in the developing hippocampus of mouse fetal brains. *FASEB J* 20:43–49.
- Wu Y, Liu Y, Chesnut JD, Rao MS (2008) Isolation of neural stem and precursor cells from rodent tissue. *Methods Mol Biol* 438:39–53.
- Mehedint MG, Niculescu MD, Craciunescu CN, Zeisel SH (2010) Choline deficiency alters global histone methylation and epigenetic marking at the Re1 site of the calbindin 1 gene. *FASEB J* 24:184–195.
- Wachs FP, et al. (2003) High efficacy of clonal growth and expansion of adult neural stem cells. *Lab Invest* 83:949–962.
- Furuta C, et al. (2006) Discordant developmental waves of angioblasts and heman-gioblasts in the early gastrulating mouse embryo. *Development* 133:2771–2779.
- Gratzner HG (1982) Monoclonal antibody to 5-bromo- and 5-iododeoxyuridine: A new reagent for detection of DNA replication. *Science* 218:474–475.
- Coffin JD, Harrison J, Schwartz S, Heimark R (1991) Angioblast differentiation and morphogenesis of the vascular endothelium in the mouse embryo. *Dev Biol* 148:51–62.
- Laitinen L (1987) Griffonia simplicifolia lectins bind specifically to endothelial cells and some epithelial cells in mouse tissues. *Histochem J* 19:225–234.
- Altman J, Bayer SA (1990) Mosaic organization of the hippocampal neuroepithelium and the multiple germinal sources of dentate granule cells. *J Comp Neurol* 301:325–342.
- Giegerich R, Meyer F, Schleiermacher C (1996) GeneFisher—software support for the detection of postulated genes. *Proc Int Conf Intell Syst Mol Biol* 4:68–77.
- Livak KJ, Schmittgen TD (2001) Analysis of relative gene expression data using real-time quantitative PCR and the 2<sup>-</sup>(Delta Delta C(T)) Method. *Methods* 25:402–408.
- Rauch T, Pfeifer GP (2005) Methylated-CpG island recovery assay: a new technique for the rapid detection of methylated-CpG islands in cancer. *Lab Invest* 85:1172–1180.
- Pomfret EA, da Costa K, Zeisel SH (1990) Effects of choline deficiency and methotrexate treatment upon rat liver. *J. Nutr. Biochem.* 1:533–541.
- Koc H, Mar MH, Ranasinghe A, Swenberg JA, Zeisel SH (2002) Quantitation of choline and its metabolites in tissues and foods by liquid chromatography/electrospray ionization-isotope dilution mass spectrometry. *Analytical chemistry* 74:4734–4740.
- Knudsen S (1999) Promoter2.0: for the recognition of PolII promoter sequences. *Bioinformatics* 15:356–361.
- Defrance M & Touzet H (2006) Predicting transcription factor binding sites using local overrepresentation and comparative genomics. *BMC Bioinformatics* 7:396.
- Matys V, et al. (2006) TRANSFAC and its module TRANSCOMP: transcriptional gene regulation in eukaryotes. *Nucleic Acids Res* 34(Database issue):D108–110.
